# Supplementary material
Source: PubMed Central journal article supplement (PMC5269474)
Supplement: NIHMS825726-supplement-1.pdf [file NIHMS825726-supplement-1.pdf]

## Supplemental Information Inventory

**Figure S1. Related to Figure 1.** Phenotype distribution in 493 (TRAMP x J:DO) F1 mice.

**Figure S2. Related to Figure 1.** Genome scans for other aggressive disease traits and modifier locus mapping for primary tumor burden as a binary trait in 493 (TRAMP x DO) F1 mice.

**Figure S3. Related to Table 1.** Coefficient plots for genes with statistically significant *cis*-eQTLs

**Figure S4. Related to Figure 3.** Candidate gene *cis*-eQTL analysis not reaching statistical significance in normal prostate tissue derived from 471 men

**Figure S5. Related to Figure 4.** Additional survival analyses in human gene expression cohorts

**Figure S6. Related to Figure 4.** Comparison of candidate gene expression in aggressive and indolent tumors, and matched normal tissue in mice and humans.

**Figure S7. Related to Figure 5.** Additional in vitro analysis of candidate gene over-expression in PC-3 and LNCaP cells.

**Table S1. Related to Figure 1.** Aggressive disease traits of 498 (TRAMP x J:DO) F1 mice displaying primary tumor burden in prostate and seminal vesicles, and metastases burden in the lung, liver and lymph nodes

**Table S2. Related to Figure 1.** Association mapping for SNPs within the Chr. 8 distant metastasis free survival locus

**Table S3. Related to Figure 2 and Table 1.** (TRAMP x J:DO) F1 primary tumor *cis*-eQTL analysis for expressed transcripts within the Chr. 8 distant metastasis free survival locus

**Table S4. Related to Figure 2 and Table 1.** Association between the expression of transcripts within the Chr. 8 locus in (TRAMP x J:DO) F1 primary tumors and distant metastasis free survival

**Table S5. Related to Table 2.** GWAS analysis of the association between haplotypes in linkage disequilibrium with eleven candidate genes and aggressive prostate cancer

**Table S6. Related to Figure 3.** Analysis of candidate gene *cis*-eQTLs in normal prostate tissue derived from a cohort of 471 men

**Table S7. Related to Figure 4.** Logistic regression analyses for seven candidate genes in each of the three human prostate cancer gene expression cohorts

**Table S8. Related to Figure 5.** Microarray data analysis of dysregulated transcripts in four PC-3 clonal isolates over-expressing *RWDD4*

**Table S9. Related to Figure 5.** Microarray data analysis of dysregulated transcripts in four PC-3 clonal isolates over-expressing *CENPU*

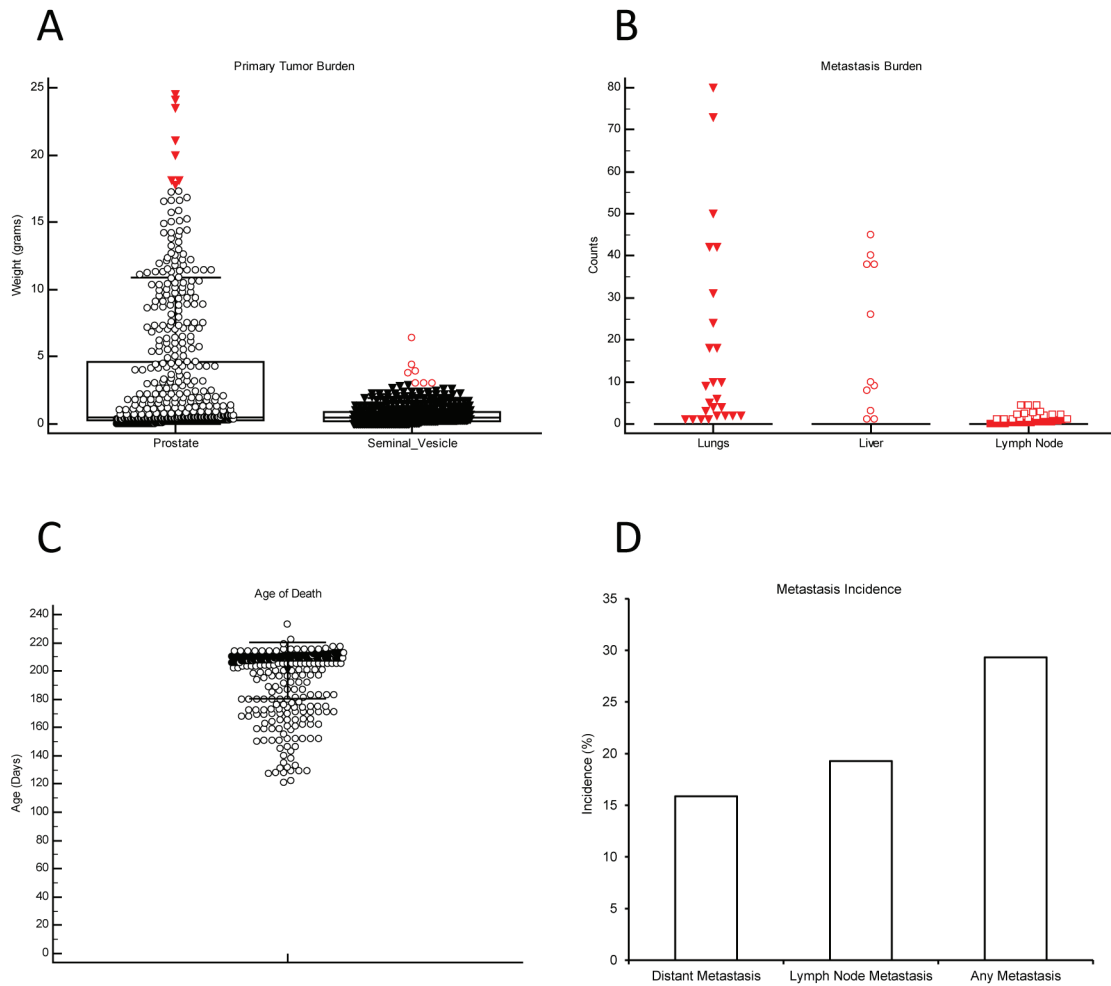

**Figure S1. Related to Figure 1. Phenotype distribution in 493 (TRAMP x J:DO) F1 mice.**

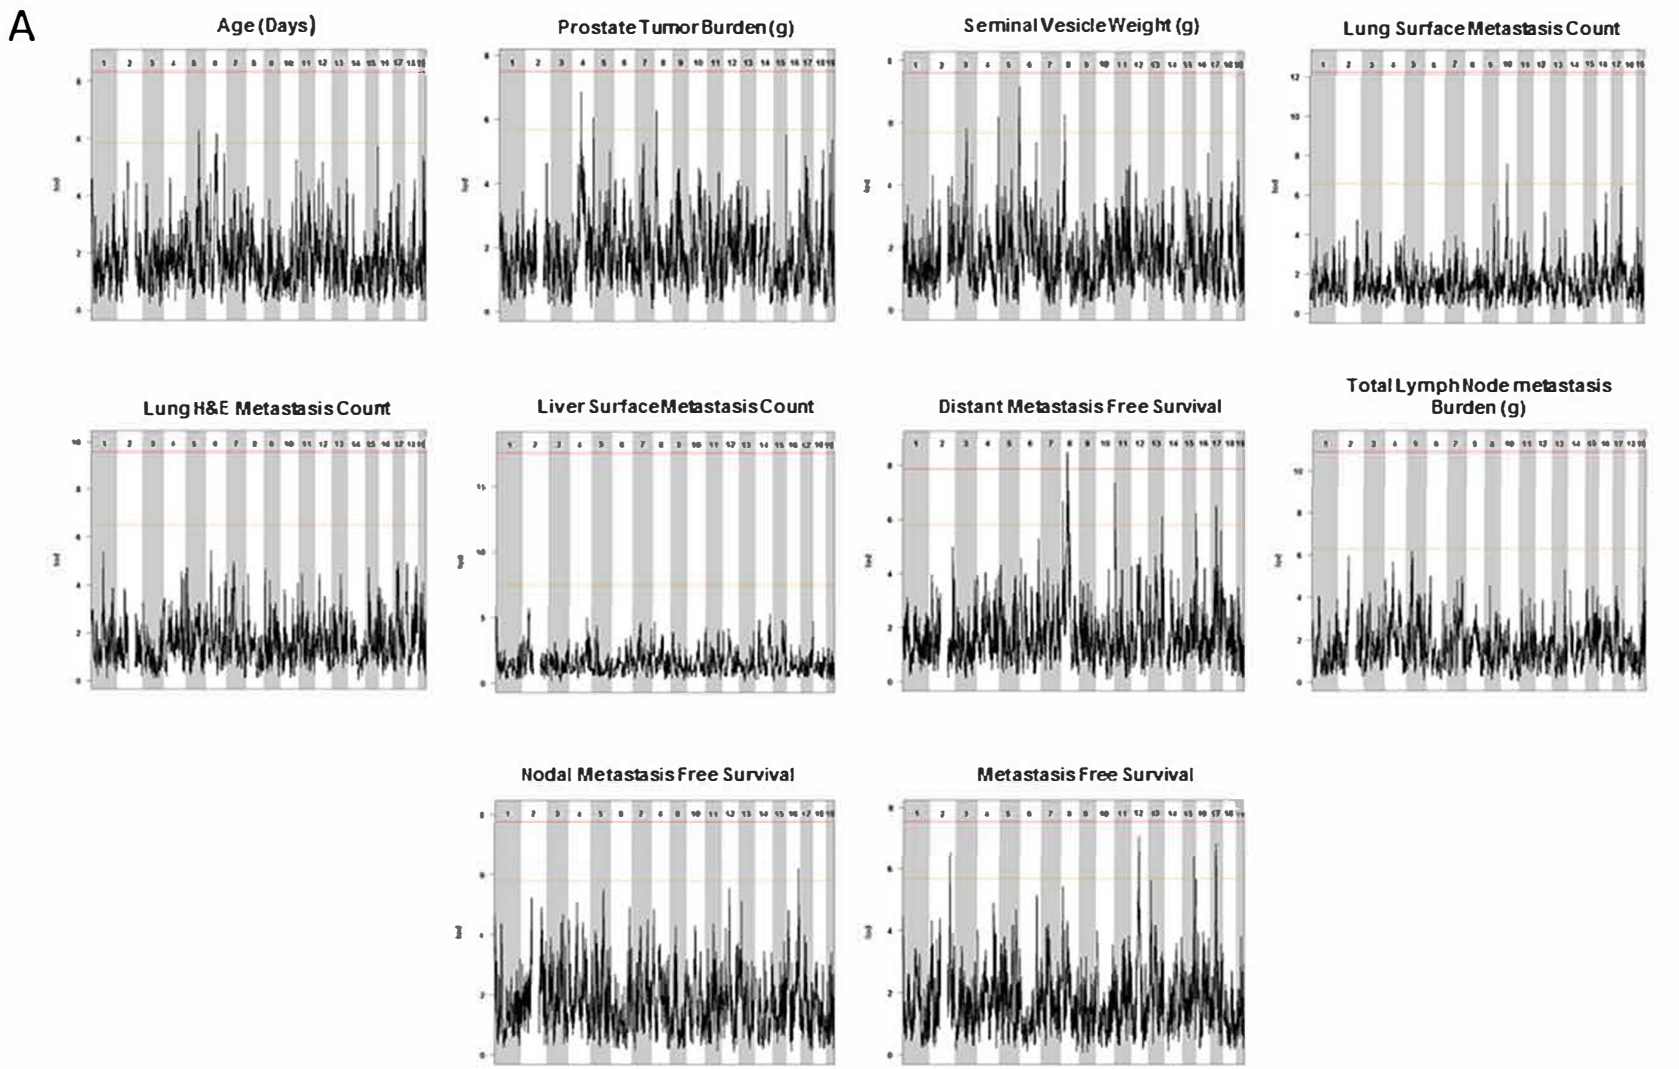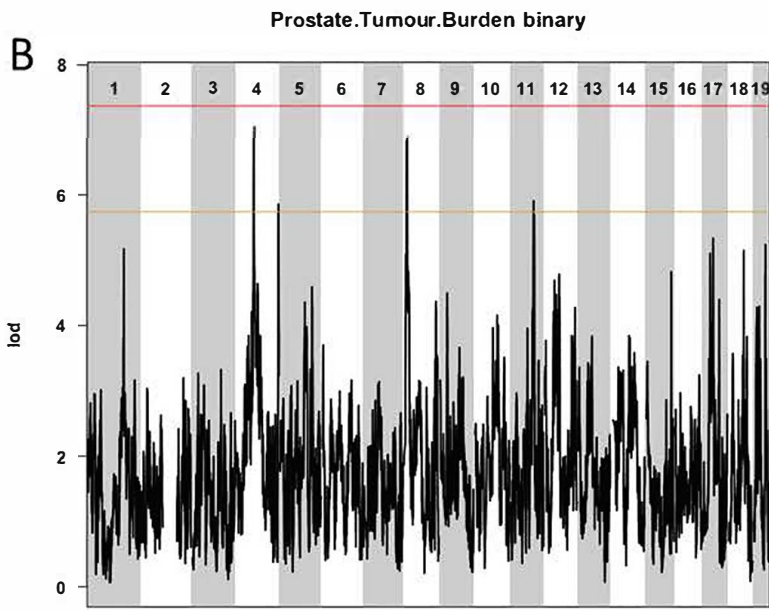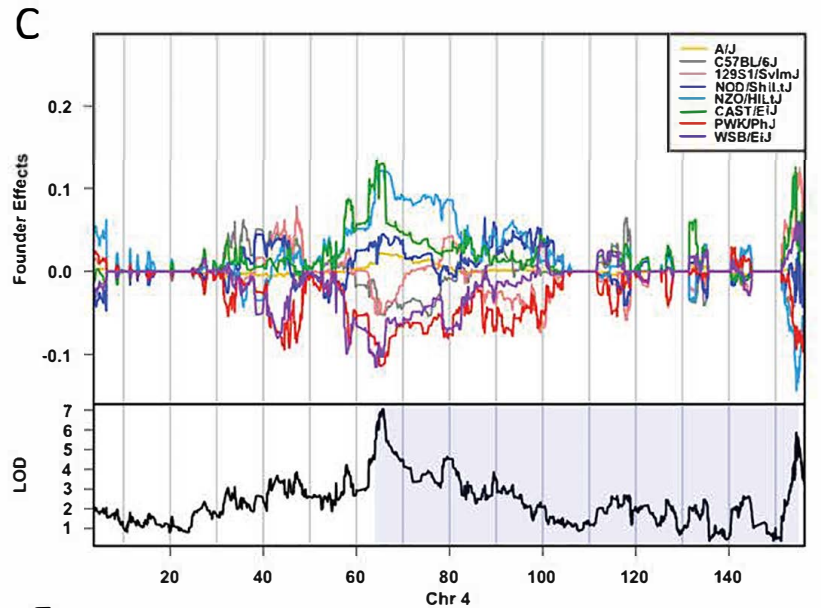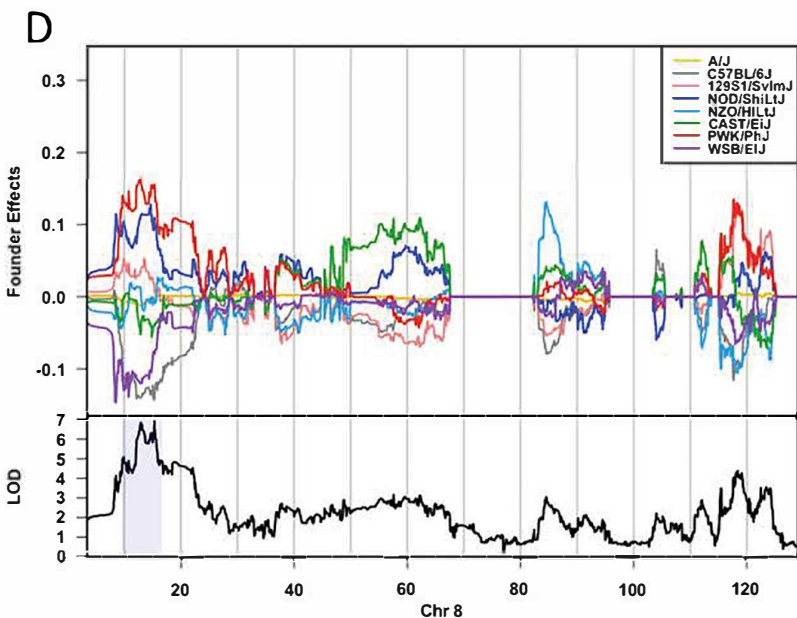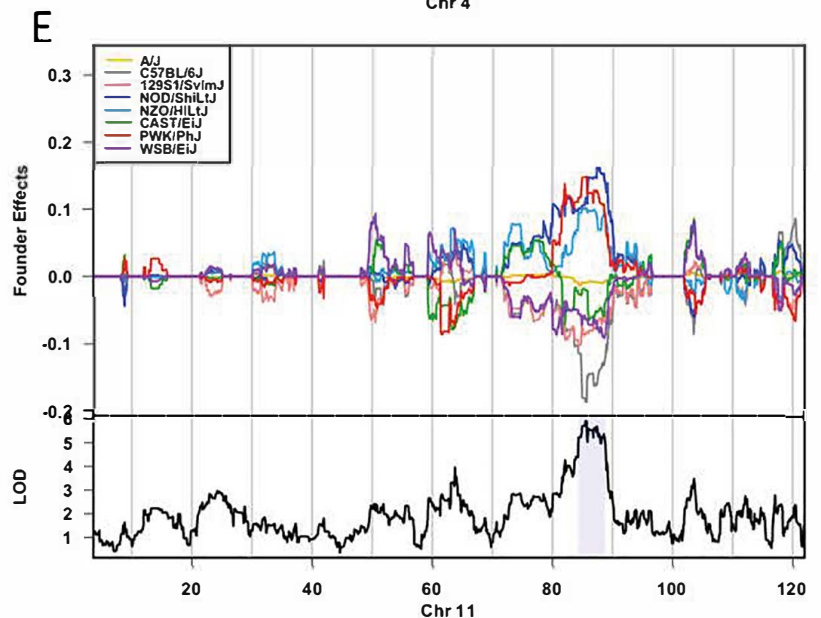

**Figure S2. Related to Figure 1.** Genome scans for other aggressive disease traits and modifier locus mapping for primary tumor burden as a binary trait in 493 (TRAMP x DO) F1 mice.

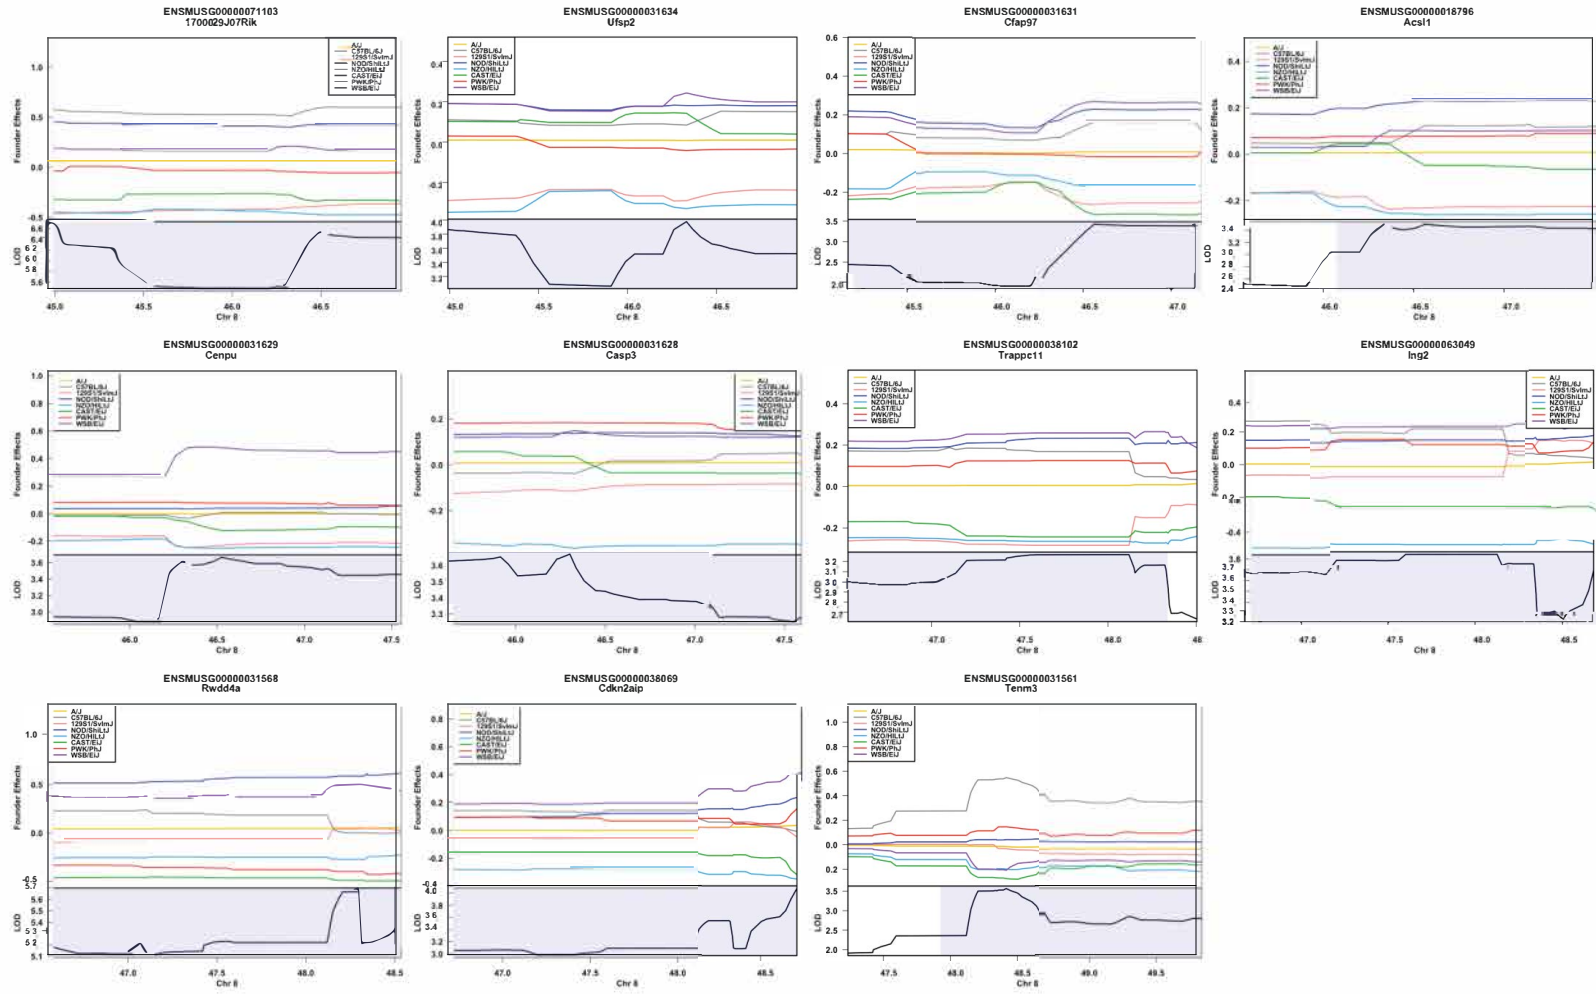

Figure S3. Related to Table 1. Coefficient plots for genes with statistically significant *cis*-eQTLs

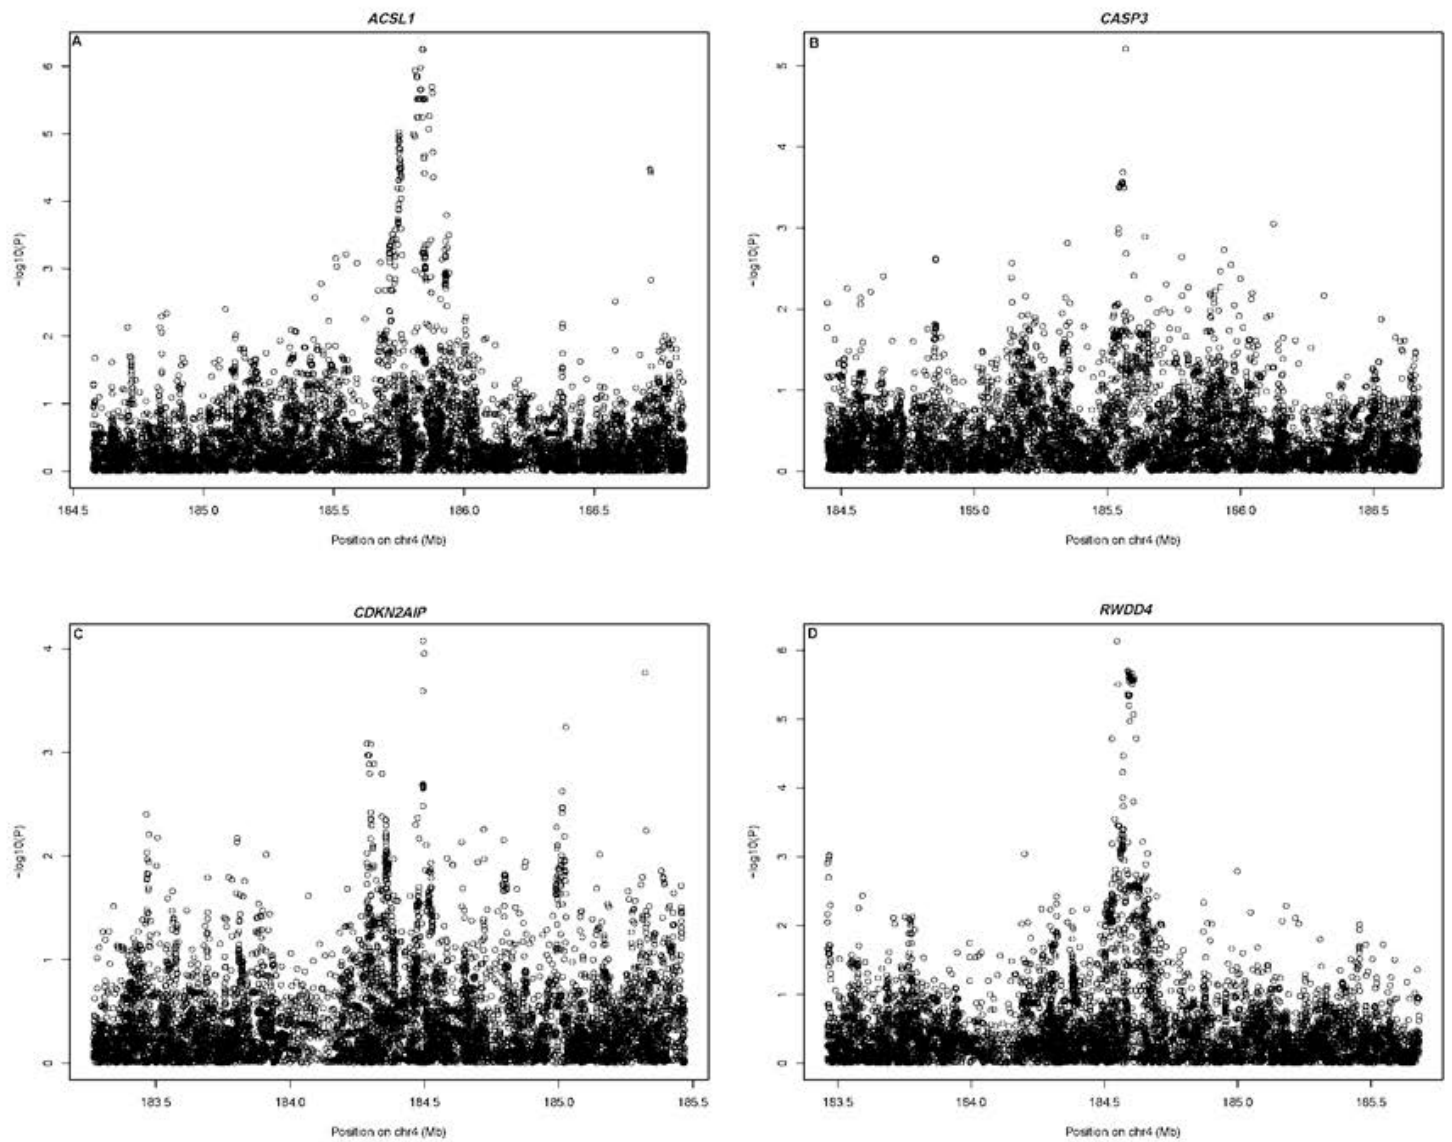

**Figure S4. Related to Figure 3.** Candidate gene *cis*-eQTL analysis not reaching statistical significance in normal prostate tissue derived from 471 men

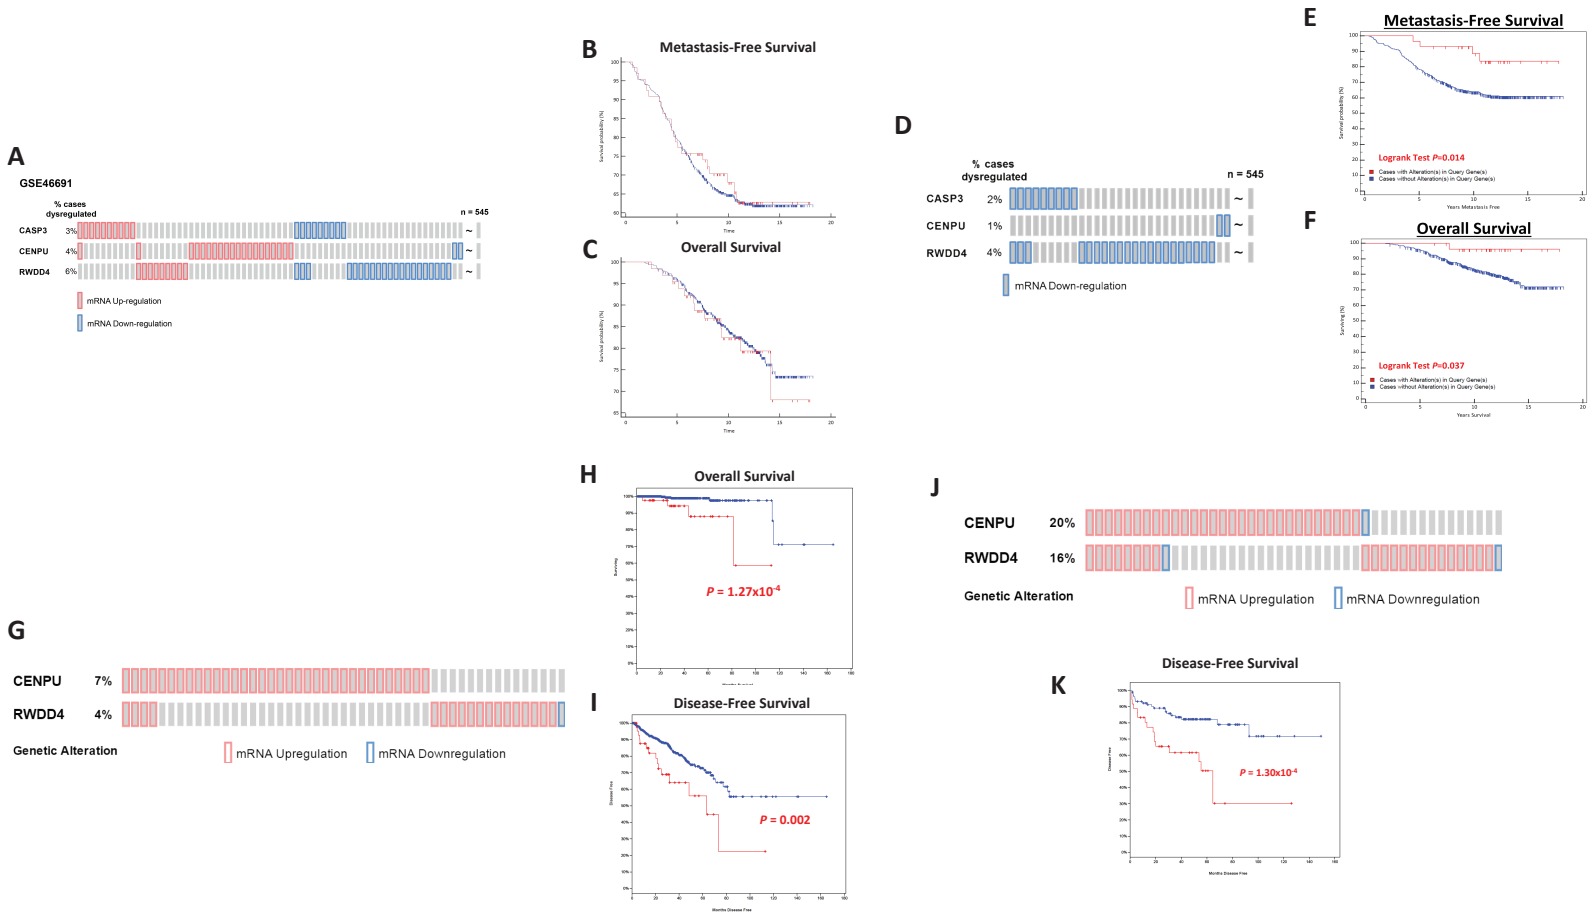

Figure S5. Related to Figure 4. Additional survival analyses in human gene expression cohorts

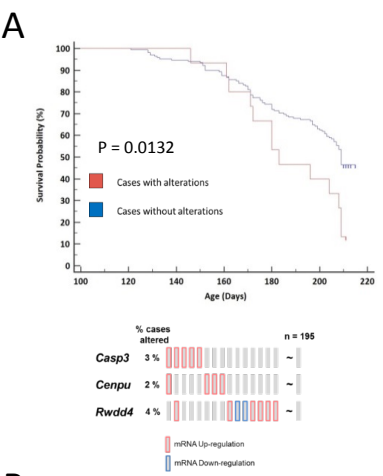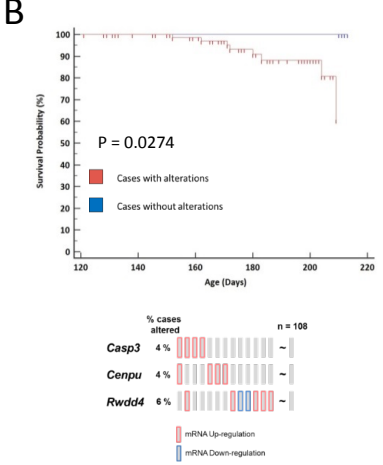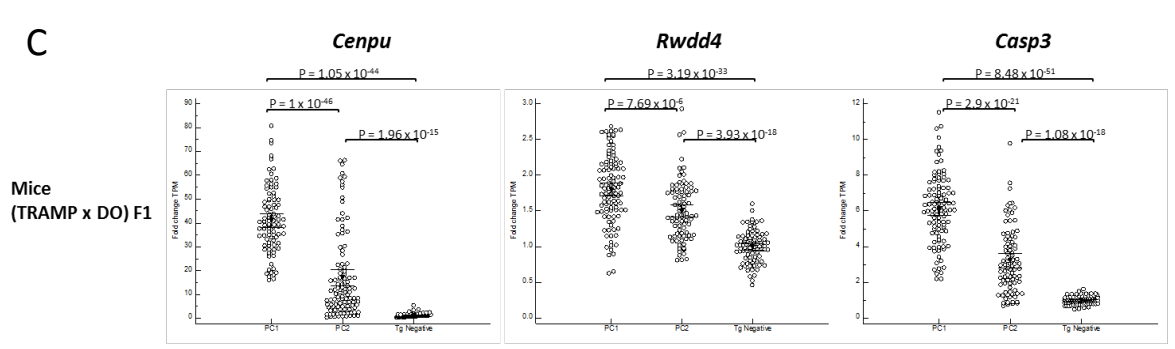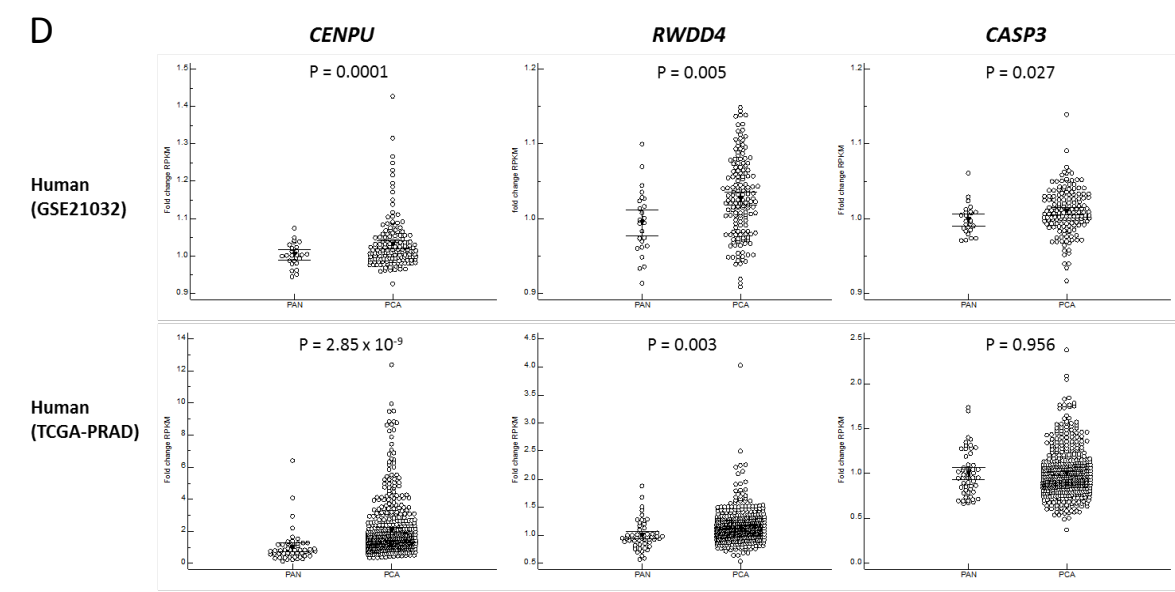

**Figure S6. Related to Figure 4.** Comparison of candidate gene expression in aggressive and indolent tumors, and matched normal tissue in mice and humans.

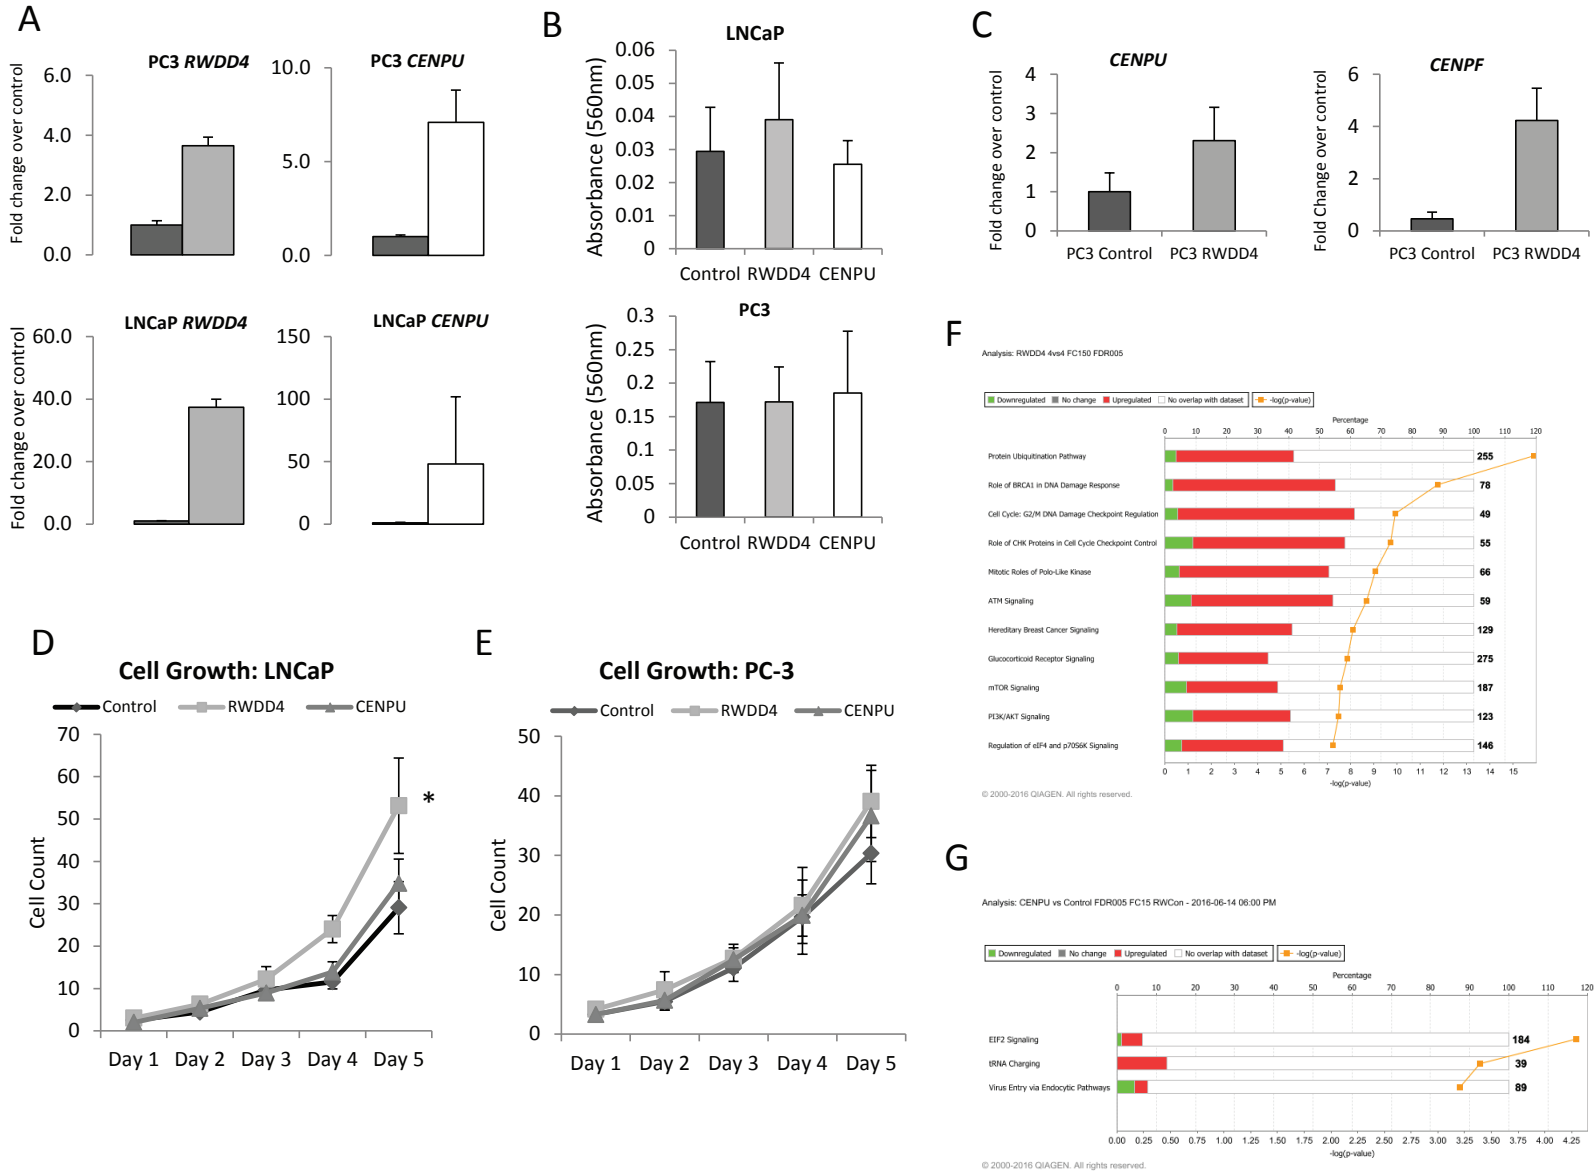

**Figure S7. Related to Figure 5.** Additional in vitro analysis of candidate gene over-expression in PC-3 and LNCaP cells.



**Table S1. Related to Figure 1.** Aggressive disease traits of 498 (TRAMP x J:DO) F1 mice displaying primary tumor burden in prostate and seminal vesicles, and metastases burden in the lung, liver and lymph nodes

|                                             | Age (Days) | Primary Tumor Burden |                      | Metastases Burden   |                      |                       |                   |
|---------------------------------------------|------------|----------------------|----------------------|---------------------|----------------------|-----------------------|-------------------|
|                                             |            | Prostate Tumor (g)   | Seminal Vesicles (g) | Distant Metastases  |                      | Lymph Node Metastases |                   |
|                                             |            |                      |                      | Lung Surface Counts | Liver Surface Counts | Lymph Node (g)        | Lymph Node Counts |
| <b>Mean</b>                                 | 200.6      | 3.25                 | 0.69                 | 0.89                | 0.44                 | 0.14                  | 0.39              |
| <b>St. Dev.</b>                             | 19.9       | 4.85                 | 0.73                 | 6.34                | 3.85                 | 0.48                  | 0.91              |
| <b>Distant Metastases Free Survival (%)</b> |            |                      |                      | 15.9                |                      | 19.3                  |                   |
| <b>Metastases Free Survival (%)</b>         |            |                      |                      | 29.3                |                      |                       |                   |

**Table S2. Related to Figure 1.** Association mapping for SNPs within the Chr. 8 distant metastasis free survival locus

**Table S3. Related to Figure 2 and Table 1. (TRAMP x J:DO) F1 primary tumor *cis*-eQTL analysis for expressed transcripts within the Chr. 8 distant metastasis free survival locus**

**Table S4. Related to Figure 2 and Table 1.** Association between the expression of transcripts within the Chr. 8 locus in (TRAMP x J:DO) F1 primary tumors and distant metastasis free survival

**Table S5. Related to Table 2.** GWAS analysis of the association between haplotypes in linkage disequilibrium with eleven candidate genes and aggressive prostate cancer

| Cohort | Candidate Gene | SNPs                                                            | SNP Distance                     | SNP position                                                  | Haplotype base        | hap                              | Clinical trait     | hap. frequency | t. value | P value  | OR       | OR.95%CI. low | OR.95%CI. high | Permutation P value |
|--------|----------------|-----------------------------------------------------------------|----------------------------------|---------------------------------------------------------------|-----------------------|----------------------------------|--------------------|----------------|----------|----------|----------|---------------|----------------|---------------------|
| CGEMS  | CDKN2AIP       | rs11940756<br>rs1567597                                         | 68866<br>64768                   | 184296922<br>184301020                                        | G<br>A                | 4.4295.<br>G<br>A                | Gleason Score      | 0.12206        | 2.586056 | 0.009822 | 1.21152  | 1.047547      | 1.401159       | 0.0109              |
| CGEMS  | ING2           | rs4862182<br>rs11725216<br>rs4415002                            | 39661<br>92117<br>90913          | 184326127<br>184334102<br>184335306                           | G<br>C<br>T           | 4.4297.<br>G<br>C<br>T           | Gleason Score      | 0.210462       | -3.17283 | 0.001547 | 0.691888 | 0.551084      | 0.868666       | 0.0028              |
| CGEMS  | TENM3          | rs2726797<br>rs2726792<br>rs2675534                             | 14249<br>8409<br>5375            | 183230887<br>183236727<br>183239761                           | A<br>G<br>C           | 4.4259.<br>A<br>G<br>C           | Pathological Stage | 0.057583       | 2.81085  | 0.00502  | 1.139939 | 1.040443      | 1.248951       | 0.0062              |
| CGEMS  | TENM3          | rs2168681<br>rs10050018<br>rs921961                             | 0<br>0<br>0                      | 183343563<br>183349618<br>183365667                           | G<br>C<br>T           | 4.4263.<br>G<br>C<br>T           | Distant Metastasis | 0.073398       | 3.021017 | 0.002571 | 1.110862 | 1.037615      | 1.18928        | 0.0026              |
| CGEMS  | TENM3          | rs2309764<br>rs6858496<br>rs12498650<br>rs6552597<br>rs6829893  | 0<br>0<br>0<br>0<br>0            | 183619206<br>183626332<br>183628872<br>183631266<br>183651765 | C<br>C<br>G<br>G<br>G | 4.4275.<br>C<br>C<br>G<br>G<br>G | Distant Metastasis | 0.134225       | 2.791587 | 0.005326 | 1.077528 | 1.022493      | 1.135526       | 0.0063              |
| CGEMS  | CDKN2AIP       | rs6821104<br>rs955229                                           | 73260<br>68905                   | 184292528<br>184296883                                        | T<br>C                | 4.4294.<br>T<br>C                | Nodal Metastasis   | 0.120032       | 3.706497 | 0.00022  | 1.095923 | 1.044105      | 1.150312       | 1.00E-04            |
| CGEMS  | CDKN2AIP       | rs11940756<br>rs1567597                                         | 68866<br>64768                   | 184296922<br>184301020                                        | A<br>A                | 4.4295.<br>A<br>A                | Nodal Metastasis   | 0.119627       | 3.382526 | 0.000741 | 1.087342 | 1.035843      | 1.141402       | 0.001               |
| CGEMS  | CDKN2AIP       | rs6821104<br>rs955229                                           | 73260<br>68905                   | 184292528<br>184296883                                        | T<br>T                | 4.4294.<br>T<br>T                | Nodal Metastasis   | 0.485401       | -2.82158 | 0.004856 | 0.956021 | 0.926615      | 0.98636        | 0.0061              |
| CGEMS  | ING2           | rs4241767<br>rs13111484<br>rs4862197<br>rs6844630               | 73081<br>69645<br>64173<br>52408 | 184353138<br>184356574<br>184362046<br>184373811              | C<br>A<br>C<br>G      | 4.4299.<br>C<br>A<br>C<br>G      | Nodal Metastasis   | 0.602595       | 2.653584 | 0.008067 | 1.045734 | 1.011757      | 1.080852       | 0.0077              |
| CGEMS  | TENM3          | rs1350317<br>rs13106786<br>rs7670943<br>rs10520533<br>rs4862074 | 0<br>0<br>0<br>0<br>0            | 183412634<br>183423315<br>183424364<br>183428859<br>183440877 | T<br>G<br>T<br>A<br>A | 4.4266.<br>T<br>G<br>T<br>A<br>A | Nodal Metastasis   | 0.351176       | -2.90732 | 0.003711 | 0.952586 | 0.921896      | 0.984297       | 0.0034              |
| CGEMS  | TENM3          | rs11132137<br>rs11726016<br>rs12499296                          | 0<br>0<br>0                      | 183525697<br>183531705<br>183536086                           | C<br>G<br>G           | 4.4270.<br>C<br>G                | Nodal Metastasis   | 0.253852       | 2.647314 | 0.008217 | 1.0516   | 1.013148      | 1.091511       | 0.0071              |

|       |       |            |   |           |   |         |                        |          |          |          |          |          |          |        |  |  |
|-------|-------|------------|---|-----------|---|---------|------------------------|----------|----------|----------|----------|----------|----------|--------|--|--|
|       |       |            |   |           |   | G       |                        |          |          |          |          |          |          |        |  |  |
|       |       | rs1516538  | 0 | 183321916 | A | 4.9366. |                        |          |          |          |          |          |          |        |  |  |
|       |       | rs6838423  | 0 | 183322044 | A | A       |                        |          |          |          |          |          |          |        |  |  |
|       |       | rs6823473  | 0 | 183323457 | A | A       |                        |          |          |          |          |          |          |        |  |  |
|       |       | rs17253954 | 0 | 183324280 | C | C       |                        |          |          |          |          |          |          |        |  |  |
|       |       | rs7666497  | 0 | 183326512 | A | A       |                        |          |          |          |          |          |          |        |  |  |
|       |       | rs6830860  | 0 | 183327907 | A | A       |                        |          |          |          |          |          |          |        |  |  |
|       |       | rs17073248 | 0 | 183328030 | G | G       |                        |          |          |          |          |          |          |        |  |  |
|       |       | rs17073255 | 0 | 183330031 | G | G       | Aggressive             |          |          |          |          |          |          |        |  |  |
| ICPCG | TENM3 | rs10520531 | 0 | 183335191 | G | G       | vs. Non-<br>Aggressive | 0.322069 | 2.936288 | 0.003322 | 1.160184 | 1.050641 | 1.281147 | 0.0033 |  |  |
|       |       | rs10050018 | 0 | 183349618 | A | 4.9367. |                        |          |          |          |          |          |          |        |  |  |
|       |       | rs11132125 | 0 | 183354559 | A | A       |                        |          |          |          |          |          |          |        |  |  |
|       |       | rs6822105  | 0 | 183361857 | G | G       |                        |          |          |          |          |          |          |        |  |  |
|       |       | rs17073286 | 0 | 183364714 | G | G       |                        |          |          |          |          |          |          |        |  |  |
|       |       | rs12498833 | 0 | 183365002 | G | G       | Aggressive             |          |          |          |          |          |          |        |  |  |
|       |       | rs921961   | 0 | 183365667 | G | G       | vs. Non-<br>Aggressive |          |          |          |          |          |          |        |  |  |
| ICPCG | TENM3 | rs12505033 | 0 | 183367131 | A | A       | Aggressive             | 0.334485 | 2.814139 | 0.004891 | 1.150894 | 1.043579 | 1.269245 | 0.0049 |  |  |
|       |       | rs13109717 | 0 | 183314359 | A | 4.9365. | Aggressive             |          |          |          |          |          |          |        |  |  |
|       |       | rs10520529 | 0 | 183315919 | G | A       | vs. Non-<br>Aggressive |          |          |          |          |          |          |        |  |  |
| ICPCG | TENM3 |            |   |           |   | G       | Aggressive             | 0.325781 | 2.794193 | 0.005203 | 1.152297 | 1.043229 | 1.272768 | 0.0059 |  |  |
|       |       | rs12186290 | 0 | 183579519 | A | 4.9385. |                        |          |          |          |          |          |          |        |  |  |
|       |       | rs4386638  | 0 | 183581152 | G | A       |                        |          |          |          |          |          |          |        |  |  |
|       |       | rs12498348 | 0 | 183582696 | A | G       |                        |          |          |          |          |          |          |        |  |  |
|       |       | rs10428431 | 0 | 183583762 | A | A       |                        |          |          |          |          |          |          |        |  |  |
|       |       | rs17073734 | 0 | 183584040 | C | C       |                        |          |          |          |          |          |          |        |  |  |
|       |       | rs12648977 | 0 | 183589823 | A | A       |                        |          |          |          |          |          |          |        |  |  |
|       |       | rs2309774  | 0 | 183590236 | G | G       |                        |          |          |          |          |          |          |        |  |  |
|       |       | rs2309760  | 0 | 183591332 | C | C       |                        |          |          |          |          |          |          |        |  |  |
|       |       | rs11132145 | 0 | 183591707 | A | A       |                        |          |          |          |          |          |          |        |  |  |
|       |       | rs2309759  | 0 | 183593318 | G | G       | Aggressive             |          |          |          |          |          |          |        |  |  |
| ICPCG | TENM3 | rs4535369  | 0 | 183594938 | A | A       | vs. Non-<br>Aggressive | 0.142089 | 2.718659 | 0.006555 | 1.207349 | 1.053989 | 1.383023 | 0.0053 |  |  |

**Table S6. Related to Fig. 3.** Analysis of candidate gene cis-eQTLs in normal prostate tissue derived from a cohort of 471 men

**Table S7. Related to Fig. 4.** Logistic regression analyses for seven candidate genes in each of the three human prostate cancer gene expression cohorts

| Gene               | Clinical Trait     | Cohort   | Odds ratio | 95% CI           | Coefficient | Std. Error | Wald    | P-Value | FDR      |
|--------------------|--------------------|----------|------------|------------------|-------------|------------|---------|---------|----------|
| CASP3              | Node Stage         | TCGA     | 1.6309     | 1.2139 to 2.1912 | 0.48913     | 0.15066    | 10.5399 | 0.0012  | 0.021    |
| CENPU              | Recurrence         | GSE21032 | 2.2838     | 1.4921 to 3.4955 | 0.82583     | 0.21717    | 14.4598 | 0.0001  | 0.0042   |
| CENPU              | Node Stage         | GSE21032 | 2.1963     | 1.3517 to 3.5686 | 0.78677     | 0.24766    | 10.0923 | 0.0015  | 0.021    |
| CENPU              | Pathological Stage | GSE21032 | 1.7629     | 1.2629 to 2.4608 | 0.56694     | 0.17016    | 11.1005 | 0.0009  | 0.021    |
| CENPU              | Pathological Stage | TCGA     | 2.5823     | 1.7877 to 3.7302 | 0.94869     | 0.18764    | 25.5618 | 0.0001  | 0.0042   |
| CENPU              | Gleason            | TCGA     | 3.5908     | 1.6060 to 8.0287 | 1.27838     | 0.41053    | 9.697   | 0.0018  | 0.0216   |
| RWDD4              | Node Stage         | GSE21032 | 0.1187     | 0.0318 to 0.4428 | -2.13087    | 0.67159    | 10.0673 | 0.0015  | 0.021    |
| RWDD4              | Gleason            | GSE21032 | 2.3755     | 1.3401 to 4.2106 | 0.86519     | 0.29204    | 8.7765  | 0.0031  | 0.03255  |
| ACSL1              | Gleason            | GSE21032 | 0.5189     | 0.3193 to 0.8434 | -0.65607    | 0.24781    | 7.0092  | 0.0081  | 0.06804  |
| ING2               | Gleason            | GSE21032 | 0.6129     | 0.4286 to 0.8765 | -0.48959    | 0.18253    | 7.1945  | 0.0073  | 0.06804  |
| CASP3              | Pathological Stage | TCGA     | 1.4291     | 1.0862 to 1.8804 | 0.35707     | 0.14001    | 6.5044  | 0.0108  | 0.082473 |
| TENM3              | Node Stage         | GSE21032 | 0.2292     | 0.0659 to 0.7971 | -1.47302    | 0.63583    | 5.3669  | 0.0205  | 0.133754 |
| ACSL1              | Node Stage         | TCGA     | 1.3111     | 1.0422 to 1.6493 | 0.27083     | 0.11709    | 5.3501  | 0.0207  | 0.133754 |
| CENPU NM_024629    | Metastasis         | GSE46691 | 1.2351     | 1.0273 to 1.4851 | 0.21118     | 0.094024   | 5.0448  | 0.0247  | 0.1482   |
| ACSL1              | Node Stage         | GSE21032 | 2.6479     | 1.1032 to 6.3556 | 0.97378     | 0.44671    | 4.7519  | 0.0293  | 0.152188 |
| ING2               | Recurrence         | GSE21032 | 0.636      | 0.4236 to 0.9549 | -0.45255    | 0.20736    | 4.7629  | 0.0291  | 0.152188 |
| ING2               | Pathological Stage | TCGA     | 0.8013     | 0.6553 to 0.9798 | -0.22152    | 0.10259    | 4.6626  | 0.0308  | 0.152188 |
| CENPU              | Recurrence         | TCGA     | 1.2767     | 1.0187 to 1.6001 | 0.24429     | 0.1152     | 4.497   | 0.034   | 0.158667 |
| CDKN2AIP           | Gleason            | TCGA     | 1.5483     | 1.0218 to 2.3459 | 0.43714     | 0.21202    | 4.251   | 0.0392  | 0.173305 |
| CASP3              | Death              | GSE46691 | 1.287      | 1.0086 to 1.6423 | 0.25233     | 0.12438    | 4.1153  | 0.0425  | 0.1744   |
| RWDD4 NM_152682    | Metastasis         | GSE46691 | 1.3131     | 1.0078 to 1.7107 | 0.27237     | 0.13497    | 4.072   | 0.0436  | 0.1744   |
| CASP3              | Recurrence         | TCGA     | 1.3119     | 1.0006 to 1.7201 | 0.27149     | 0.1382     | 3.8588  | 0.0495  | 0.180783 |
| CASP3              | Metastasis         | GSE46691 | 1.2194     | 1.0007 to 1.4857 | 0.19832     | 0.10081    | 3.8704  | 0.0491  | 0.180783 |
| ING2               | Pathological Stage | GSE21032 | 0.7374     | 0.5342 to 1.0179 | -0.30463    | 0.1645     | 3.4295  | 0.064   | 0.21504  |
| CDKN2AIP           | Recurrence         | TCGA     | 0.7668     | 0.5793 to 1.0151 | -0.2655     | 0.14311    | 3.4416  | 0.0636  | 0.21504  |
| TENM3 NM_001080477 | Recurrence         | GSE46691 | 0.8347     | 0.6853 to 1.0166 | -0.18073    | 0.10062    | 3.2261  | 0.0725  | 0.234231 |
| CENPU NM_024629    | Recurrence         | GSE46691 | 1.1863     | 0.9765 to 1.4412 | 0.17083     | 0.09931    | 2.959   | 0.0854  | 0.265689 |
| ING2               | Recurrence         | TCGA     | 0.8125     | 0.6345 to 1.0406 | -0.20762    | 0.12621    | 2.7062  | 0.1     | 0.291393 |
| RWDD4              | Gleason            | TCGA     | 0.7681     | 0.5605 to 1.0525 | -0.26386    | 0.16071    | 2.6956  | 0.1006  | 0.291393 |
| TENM3              | Recurrence         | GSE21032 | 1.4917     | 0.8890 to 2.5030 | 0.39993     | 0.26406    | 2.2938  | 0.1299  | 0.340988 |
| CDKN2AIP           | Death              | GSE46691 | 0.8181     | 0.6327 to 1.0577 | -0.20083    | 0.13109    | 2.3469  | 0.1255  | 0.340988 |
| RWDD4 NM_152682    | Death              | GSE46691 | 1.2877     | 0.9284 to 1.7861 | 0.25288     | 0.16692    | 2.295   | 0.1298  | 0.340988 |
| ING2               | Node Stage         | TCGA     | 0.8003     | 0.5971 to 1.0727 | -0.22274    | 0.14946    | 2.221   | 0.1361  | 0.346436 |



|                    |                    |          |        |                  |           |          |        |        |          |
|--------------------|--------------------|----------|--------|------------------|-----------|----------|--------|--------|----------|
| CENPU              | Gleason            | GSE21032 | 1.2983 | 0.9079 to 1.8565 | 0.26102   | 0.18249  | 2.0458 | 0.1526 | 0.36624  |
| TENM3              | Gleason            | TCGA     | 0.7921 | 0.5764 to 1.0886 | -0.23302  | 0.16222  | 2.0633 | 0.1509 | 0.36624  |
| ING2               | Recurrence         | GSE46691 | 1.143  | 0.9466 to 1.3801 | 0.13365   | 0.096185 | 1.9308 | 0.1647 | 0.3843   |
| TENM3 NM_001080477 | Metastasis         | GSE46691 | 0.8749 | 0.7221 to 1.0601 | -0.13363  | 0.097962 | 1.8608 | 0.1725 | 0.391622 |
| CENPU              | Node Stage         | TCGA     | 1.1748 | 0.9278 to 1.4875 | 0.16109   | 0.12043  | 1.7893 | 0.181  | 0.400105 |
| CDKN2AIP           | Node Stage         | GSE21032 | 0.6537 | 0.3410 to 1.2532 | -0.42504  | 0.33202  | 1.6388 | 0.2005 | 0.431846 |
| ACSL1              | Death              | TCGA     | 1.2903 | 0.8662 to 1.9222 | 0.25488   | 0.20335  | 1.5711 | 0.2101 | 0.440427 |
| CASP3              | Node Stage         | GSE21032 | 1.4418 | 0.7973 to 2.6072 | 0.36588   | 0.30225  | 1.4654 | 0.2261 | 0.440427 |
| TENM3 NM_001080477 | Death              | GSE46691 | 0.8653 | 0.6832 to 1.0961 | -0.14462  | 0.1206   | 1.4381 | 0.2304 | 0.440427 |
| CDKN2AIP           | Metastasis         | GSE46691 | 0.8765 | 0.7109 to 1.0808 | -0.13177  | 0.10689  | 1.5196 | 0.2177 | 0.440427 |
| ING2               | Metastasis         | GSE46691 | 1.1227 | 0.9291 to 1.3566 | 0.11574   | 0.096563 | 1.4367 | 0.2307 | 0.440427 |
| RWDD4              | Node Stage         | TCGA     | 0.8432 | 0.6332 to 1.1228 | -0.1706   | 0.14614  | 1.3628 | 0.2431 | 0.453787 |
| RWDD4 NM_152682    | Recurrence         | GSE46691 | 1.1601 | 0.8948 to 1.5039 | 0.14846   | 0.13245  | 1.2563 | 0.2623 | 0.478983 |
| TENM3              | Gleason            | GSE21032 | 0.7726 | 0.4818 to 1.2391 | -0.25795  | 0.24098  | 1.1458 | 0.2844 | 0.489429 |
| TENM3              | Pathological Stage | GSE21032 | 1.2701 | 0.8228 to 1.9604 | 0.23908   | 0.22147  | 1.1653 | 0.2804 | 0.489429 |
| ACSL1              | Gleason            | TCGA     | 0.8004 | 0.5319 to 1.2044 | -0.22266  | 0.2085   | 1.1405 | 0.2855 | 0.489429 |
| CENPU NM_024629    | Death              | GSE46691 | 1.1202 | 0.8999 to 1.3943 | 0.11347   | 0.1117   | 1.0319 | 0.3097 | 0.520296 |
| CASP3              | Pathological Stage | GSE21032 | 0.8663 | 0.6537 to 1.1481 | -0.14352  | 0.1437   | 0.9974 | 0.3179 | 0.5236   |
| TENM3              | Pathological Stage | TCGA     | 1.1183 | 0.8942 to 1.3985 | 0.11178   | 0.11407  | 0.9602 | 0.3271 | 0.528392 |
| CASP3              | Gleason            | GSE21032 | 1.1591 | 0.8543 to 1.5726 | 0.14762   | 0.15568  | 0.8992 | 0.343  | 0.533556 |
| ACSL1              | Recurrence         | GSE46691 | 0.8859 | 0.6903 to 1.1369 | -0.12114  | 0.12726  | 0.9062 | 0.3411 | 0.533556 |
| CDKN2AIP           | Pathological Stage | GSE21032 | 1.1735 | 0.8247 to 1.6698 | 0.16001   | 0.17995  | 0.7907 | 0.3739 | 0.56085  |
| CDKN2AIP           | Node Stage         | TCGA     | 0.8698 | 0.6404 to 1.1813 | -0.1395   | 0.15619  | 0.7977 | 0.3718 | 0.56085  |
| CASP3              | Gleason            | TCGA     | 1.2244 | 0.7579 to 1.9782 | 0.20246   | 0.24475  | 0.6843 | 0.4081 | 0.601411 |
| CDKN2AIP           | Pathological Stage | TCGA     | 1.1082 | 0.8629 to 1.4230 | 0.10269   | 0.12761  | 0.6476 | 0.421  | 0.609724 |
| CENPU              | Death              | TCGA     | 1.2219 | 0.7401 to 2.0172 | 0.20039   | 0.25578  | 0.6138 | 0.4334 | 0.617044 |
| CASP3              | Recurrence         | GSE46691 | 0.9252 | 0.7568 to 1.1312 | -0.077699 | 0.10255  | 0.5741 | 0.4486 | 0.62804  |
| ING2               | Death              | TCGA     | 1.2218 | 0.7096 to 2.1036 | 0.20029   | 0.27723  | 0.522  | 0.47   | 0.647213 |
| ING2               | Gleason            | TCGA     | 1.128  | 0.8043 to 1.5819 | 0.12041   | 0.17257  | 0.4869 | 0.4853 | 0.657503 |
| TENM3              | Node Stage         | TCGA     | 0.9192 | 0.7106 to 1.1888 | -0.084306 | 0.13127  | 0.4125 | 0.5207 | 0.694267 |
| ING2               | Death              | GSE46691 | 1.0767 | 0.8514 to 1.3615 | 0.07388   | 0.11976  | 0.3805 | 0.5373 | 0.705206 |
| CDKN2AIP           | Death              | TCGA     | 0.8052 | 0.3932 to 1.6490 | -0.21663  | 0.36572  | 0.3509 | 0.5536 | 0.715422 |
| CDKN2AIP           | Gleason            | GSE21032 | 0.8881 | 0.5923 to 1.3317 | -0.11863  | 0.20669  | 0.3295 | 0.566  | 0.720364 |
| CDKN2AIP           | Recurrence         | GSE21032 | 1.0905 | 0.7198 to 1.6520 | 0.086593  | 0.21195  | 0.1669 | 0.6829 | 0.856173 |
| CASP3              | Recurrence         | GSE21032 | 1.0613 | 0.7678 to 1.4672 | 0.059529  | 0.16521  | 0.1298 | 0.7186 | 0.881148 |
| TENM3              | Recurrence         | TCGA     | 0.9561 | 0.7455 to 1.2263 | -0.044867 | 0.12696  | 0.1249 | 0.7238 | 0.881148 |

|                 |                           |                 |        |                  |           |         |          |        |          |
|-----------------|---------------------------|-----------------|--------|------------------|-----------|---------|----------|--------|----------|
| <b>RWDD4</b>    | <b>Recurrence</b>         | <b>TCGA</b>     | 0.9625 | 0.7618 to 1.2160 | -0.03824  | 0.1193  | 0.1027   | 0.7486 | 0.89832  |
| <b>ING2</b>     | <b>Node Stage</b>         | <b>GSE21032</b> | 0.9199 | 0.5321 to 1.5903 | -0.083484 | 0.2793  | 0.08935  | 0.765  | 0.903583 |
| <b>TENM3</b>    | <b>Death</b>              | <b>TCGA</b>     | 0.9264 | 0.5489 to 1.5634 | -0.076483 | 0.267   | 0.08205  | 0.7745 | 0.903583 |
| <b>ACSL1</b>    | <b>Recurrence</b>         | <b>TCGA</b>     | 1.0287 | 0.8299 to 1.2752 | 0.028338  | 0.10958 | 0.06688  | 0.7959 | 0.909016 |
| <b>ACSL1</b>    | <b>Pathological Stage</b> | <b>TCGA</b>     | 0.9708 | 0.7713 to 1.2220 | -0.029616 | 0.11739 | 0.06365  | 0.8008 | 0.909016 |
| <b>CASP3</b>    | <b>Death</b>              | <b>TCGA</b>     | 1.0736 | 0.5595 to 2.0600 | 0.071012  | 0.33249 | 0.04561  | 0.8309 | 0.930608 |
| <b>RWDD4</b>    | <b>Recurrence</b>         | <b>GSE21032</b> | 1.0574 | 0.5965 to 1.8745 | 0.055837  | 0.29209 | 0.03654  | 0.8484 | 0.937705 |
| <b>ACSL1</b>    | <b>Recurrence</b>         | <b>GSE21032</b> | 0.9656 | 0.5973 to 1.5611 | -0.034991 | 0.24508 | 0.02038  | 0.8865 | 0.939659 |
| <b>RWDD4</b>    | <b>Death</b>              | <b>TCGA</b>     | 1.0336 | 0.6280 to 1.7014 | 0.033073  | 0.25426 | 0.01692  | 0.8965 | 0.939659 |
| <b>RWDD4</b>    | <b>Pathological Stage</b> | <b>TCGA</b>     | 0.982  | 0.7893 to 1.2217 | -0.018203 | 0.11146 | 0.02667  | 0.8703 | 0.939659 |
| <b>ACSL1</b>    | <b>Metastasis</b>         | <b>GSE46691</b> | 0.9855 | 0.7729 to 1.2566 | -0.014617 | 0.12398 | 0.0139   | 0.9061 | 0.939659 |
| <b>CDKN2AIP</b> | <b>Recurrence</b>         | <b>GSE46691</b> | 0.983  | 0.7942 to 1.2167 | -0.017115 | 0.10882 | 0.02474  | 0.875  | 0.939659 |
| <b>RWDD4</b>    | <b>Pathological Stage</b> | <b>GSE21032</b> | 1.0193 | 0.6295 to 1.6507 | 0.019147  | 0.24593 | 0.006061 | 0.9379 | 0.9492   |
| <b>ACSL1</b>    | <b>Death</b>              | <b>GSE46691</b> | 1.0124 | 0.7554 to 1.3568 | 0.012302  | 0.1494  | 0.00678  | 0.9344 | 0.9492   |
| <b>ACSL1</b>    | <b>Pathological Stage</b> | <b>GSE21032</b> | 1.0116 | 0.6779 to 1.5096 | 0.011519  | 0.20425 | 0.003181 | 0.955  | 0.955    |

**Table S8. Related to Fig. 5.** Microarray data analysis of dysregulated transcripts in four PC-3 clonal isolates over-expressing *RWDD4*

**Table S9. Related to Fig. 5.** Microarray data analysis of dysregulated transcripts in four PC-3 clonal isolates over-expressing *CENPU*
